# Supplementary material for: An Index to Determine Vulnerability of Communities in a Coastal Zone: A Case Study of Baler, Aurora, Philippines
Source: Springer Nature journal article supplement (doi:10.1007/s13280-012-0331-0), 2012-07-13
Supplement: MOESM2 [file 13280_2012_331_MOESM2_ESM.doc]

Table 2. Description of scales for ranking variable components of sub-factor indicators. Scales for measuring different indicator variables and their respective components are shown here. Each scale has a specific range from low to high and is respectively quantified to describe responses of individuals in a social survey.

| **Indicator Variables** | **Variable Components** | **Variable Scales** | **Description of Scales** |
| --- | --- | --- | --- |
| Total frequency of (3) different natural hazards | Seasonal change | 5= Very often (4 events or more)  4= Often (3 events)  3= Occasional (only 2 events)  2= Seldom (only 1 event)  1= Never (no event) | Frequency of hazard occurrence refers to the number of times that a hazard has impacted the community’s social and/or environmental and/or economic resources in 2009 |
| Natural disaster |
| Natural calamity |
| Total frequency of (4) different social hazards | Human environmental destruction |
| Social conflict |
| Social discrimination |
| Social security |
| Total intensity of (3) different natural hazards | Seasonal change | 5= Negative (resources destroyed causing negative results to well-being)  4= Moderately negative (some destroyed with some negative results to well-being)  3= No effect (no change in resources and/or benefits)  2= Moderately positive (with some positive benefits)  1= Positive (very positive benefits) | Intensity of occurrence of hazard refers to type of effects that a hazard has impacted the community’s social and/or environmental and/or economic resources in 2009 |
| Natural disaster |
| Natural calamity |
| Total intensity of (4) different social hazards | Human environmental destruction |
| Social conflict |
| Social discrimination |
| Social security |
| Total importance of (6) different services from coastal ecosystems | Fisheries services | 3= Not important (not used for needs of individuals)  2= Important (source of needs of individuals)  1= Very important (only source of needs of individuals) | Ecosystem services encompassing the four types of services (e.g. cultural, provisioning, sustaining and regulating) that are important to the community’s social and/or environmental and/or economic needs in 2009 |
| Recreation services |
| Forestry services |
| Quarry services |
| Ornamental services |
| Medicinal services |
| Total access to (6) different services from coastal ecosystems | Fisheries services | 4= No access (full restriction to access)  3= Indirect access (access comes from individuals with direct access)  2= Direct but difficult access (regulation impose restrictions for access)  1= Direct and easy access (regulation allows access) | Ecosystem services encompassing the four types of services (e.g. cultural, provisioning, sustaining and regulating) that can be accessed by the community for its social and/or environmental and/or economic needs in 2009 |
| Recreation services |
| Forestry services |
| Quarry services |
| Ornamental services |
| Medicinal services |
| Total fisheries used for food gathered from (2) main industry sources | Municipal fisheries production used for food | 3= < 50% (large dependency)  2= > 25% but < 50% (medium dependent)  1= < 25% (less dependent) | Annual fisheries production in 2009 from municipal (within 15km from shoreline) and commercial (outside 15km zone) that is used for entirely for food by communities |
| Commercial fisheries production used for food |
| Total availability of (4) food production activities from utilized land | Fish farming | 4= None (not available at all)  3= Sold commercially outside community (available but with more competition)  2= Sold commercially within community (available with less competition)  1= Personal and family (available with no competition) | Different food sources that are available and accessible to communities, for them to supplement their daily food needs in 2009 |
| Livestock raising |
| Crop production |
| Fruit tree farming |
| Total income sourced from fisheries gathered from (2) main industry sources | Municipal fisheries production used for livelihood and income | 3= > 50% (large dependency)  2= > 25% but < 50% (medium dependent)  1= < 25% (less dependent) | Annual fisheries production in 2009 from municipal (within 15km from shoreline) and commercial (outside 15km zone) that is used for entirely for livelihood and income by communities |
| Commercial fisheries production used for livelihood and income |
| Total engagement in (9) other income sources other than fisheries and fisheries-related work | Agriculture | 4= Very important (only income source)  3= Important (major income source)  2= Less important (minor income source)  1= Not important  (not source of income) | Different income and livelihood sources for communities according to its contribution in supporting their daily needs in 2009 |
| Livestock raising |
| Small business |
| Forestry |
| Handicraft |
| Regular Salary |
| Remittance from abroad |
| Pension |
| Daily wages |
| Total knowledge of respondents on the nature of environmental activities by (5) institutions | Local Government | 3= No programs (inactive)  2= With programs acting as support institution (reactive and supportive)  1= With programs acting as lead institution (autonomous and proactive) | Various institutions in 2009 that have been locally implementing resource management programs and their relative capacity for implementation |
| Barangay/ Village |
| Non Government Organization |
| National Government Agencies |
| Church/ Religious Sects |
| Total participation of communities in (4) different environmental activities | Establishment of Marine Protected Area | 4= None (no participation)  3= Indirect (did not attend any but adheres to the activities)  2= Minimal (participated in two or three activities)  1= Full (participated all process in activities) | Various activities in 2009 that are implemented for coastal resource management that have been participated into by members of the community |
| Fisheries law enforcement |
| Registration and licensing for fishing activities |
| Habitat enhancement (Mangrove planting, MPA) |
| Total population based on age classification | Age of members by different class | 4= Above 60 years old (old)  3= 50 to 60 years old (somewhat old)  2= 35 to 50 years old (middle aged)  1= 35 and below (young) | Prevalent age class of individual members of the community |
| Total duration of stay in current employment bracketed in specific year ranges | Length of stay in current employment | 4= less than 3 years (short)  3= 3 years to less than 5 years (medium)  2= 5 years to less than 10 years (long)  1= More than 10 years (very long) | Security of individual members of communities based on the length of stay in current employment |
| Number of households members based on different size classifications | Household size classification (small, medium, large, extended) | 4= more than 8 members (extended)  3= 6-8 members (large)  2= 4-5 members (medium)  1= 3 or less (small) | Measure of household size based on the number of members in each household |
| Security of tenure based on duration in current residence and based on the type of ownership of current house and residential lot | Type of ownership of current house and residential lot | 1= Own or owner-like possession of house and lot  2= Rent house, owned lot  3= Own house, rent lot  4= Own house, rent-free lot with consent of owner  5= Own house, rent-free lot without consent of owner  6= Rent house/room including lot  7= Rent house, rent-free lot with consent of owner  8= Rent house, rent-free lot without consent of owner  9= Rent-free house and lot with consent of owner  10= Rent-free house and lot without consent of owner | Security of individual members of communities based on the type of ownership of current house and lot.  Note: Variables were reclassified into different ranges:  3= not secured (from 8 to 10)  2= medium security (from 5 to 7)  1= with security (from 1 to 4) |
| Length of stay in current house and residential land | 4= 0 month to less than 1 year  3= 1 year to 3 years  2= More than 3 years to 5 years  1= More than 5 years | Security of individual members of communities based on the duration of stay in current house and lot |
| Availability of land for cultivation based on ownership | Ownership of land other than residential land | 2= No (without land)  1= Yes (with land) | Land was use for assessing the availability of natural capital |
| Utilization of owned land based on percentage cultivation | Fish farming | 5= None  4= <25%  3= >25% but < 50%  2= >50% but <70%  1= 75% to 100% | Land that is cultivated and used for contributing to income and community’s sense of well-being in 2009 |
| Livestock raising |
| Crop production |
| Fruit tree farming |
| Total membership recognizing (4) different benefits from organization | Networking assistance | 4= Not important (no benefits)  3= Less important (with minimal benefits)  2= Important (with some benefits)  1= Very important (highest benefits) | Important benefits in 2009 that can be received by an individual that is a member of a social organization |
| Training assistance |
| Monetary assistance |
| Livelihood assistance |
| Total value on importance and access to different information sources | Importance of information sources (e.g. local information board, villager’s meeting, printed materials, informant’s visiting the area and mass media (TV, radio) | 3= Not important (not used for information of individuals)  2= Important (source of information of individuals)  1= Very important (only source of information of individuals) | Different information sources in 2009 that are available and important for communities for their social and/or environmental and/or economic needs |
| Access of communities on information sources (e.g. local information board, villager’s meeting, printed materials, informant’s visiting the area, mass media (TV, radio) | 4= No access (lack of access)  3= Indirect access (access is shared by members with direct access)  2= Direct but difficult access (organization impose restrictions on members for access)  1= Direct and easy access (membership allows access) | Different information sources in 2009 that are available and accessible for communities for their social and/or environmental and/or economic needs |
| Total workforce based on physical capacity and health of members | Health of individual community members | 4= Once per month (sick very often)  3= Once per quarter (sick occasionally)  2= Once per semester (sick seldom)  1= None (never sick) | Factor of quality labor from frequency of incidents of absence from work of individual members due to health reasons in 2009 (illness, etc.) |
| Total availability of (4) types of liquefiable assets | Bank books | 2= No (not available)  1= Yes (available) | Reliable sources or inflows of money other than regular salaries or income that individuals use to augment or to support recovery from emergency financial obligations in 2009 |
| Land titles |
| Car ownership and registration |
| Insurance bonds |
| Total availability of (3) types for the (3) kinds of physical assets (transportation, communication, livelihood implement) | Bicycle (transportation) | 2= No (not available)  1= Yes (available) | Comprises the basic infrastructure or goods that support communities for their social and/or environmental and/or economic needs in 2009 |
| Motorbike (transportation) |
| Car (transportation) |
| TV (communication) |
| Radio (communication) |
| Phone/ mobile phone (communication) |
| Boat (livelihood implement) |
| Cattle cart (livelihood implement) |
| Farming/ fishing gear (livelihood implement) |
